# Supplementary material for: Strain-induced metal-semimetal transition of BeB2 monolayer
Source: Royal Society of Chemistry journal article supplement (doi:10.1039/c4ra14684k), 2015-01-01
Supplement: c4ra14684k1.pdf [file c4ra14684k1.pdf]

Electronic Supplementary Material (ESI) for RSC Advances.

This journal is © The Royal Society of Chemistry 2014

## Strain-induced Metal-Semimetal Transition of BeB<sub>2</sub> Monolayer

Yuewen Mu,<sup>\*,a,b</sup> Feng Ding,<sup>\*,b</sup> Haigang Lu<sup>a</sup>

<sup>a</sup> Key Laboratory of Chemical Biology and Molecular Engineering of the Education Ministry, Institute of Molecular Science, Shanxi University, Taiyuan, People's Republic of China; E-mail: ywmu@sxu.edu.cn

<sup>b</sup> Institute of Textiles and Clothing, Hong Kong Polytechnic University, Hong Kong, China; E-mail: feng.ding@polyu.edu.hk

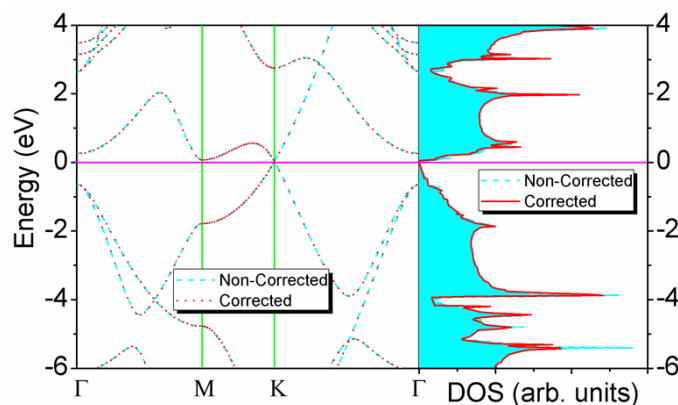

**Figure S1.** The band structure and total density of states (DOS) of BeB<sub>2</sub> monolayer under isotropic strain  $\varepsilon = -5\%$  without (Non-Corrected) and with (Corrected) dipole correction. The filled-area (cyan) curve represented the DOS of BeB<sub>2</sub> monolayer under  $\varepsilon = -5\%$  without dipole correction. The curves of band structure and DOS in two cases were basically in coincidence, which suggested that the dipole interaction between mirrors was negligible for our system due to small base plane distance and large vacuum spacing (more than 15 Å).

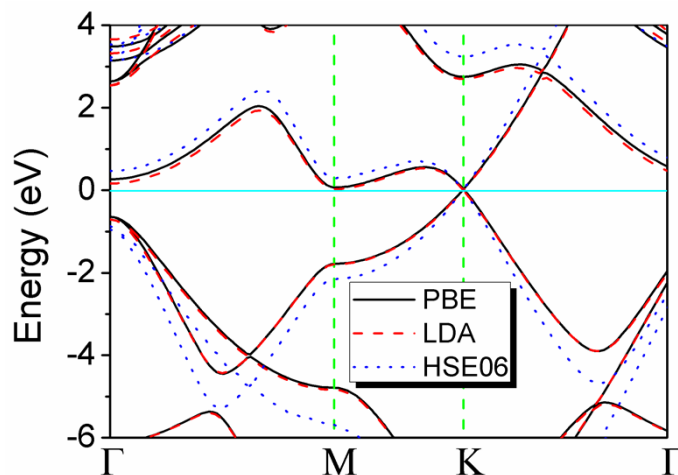

**Figure S2.** The band structures of BeB<sub>2</sub> monolayer under isotropic strain  $\varepsilon = -5\%$  at PBE, LDA and HSE06 levels. The Dirac point of BeB<sub>2</sub> monolayer still lied at the Fermi level in the cases of LDA and Hybrid HSE06 functionals.
